# Supplementary material
Source: Springer Nature journal article supplement (https://www.springermedizin.de/resource/supplementary/12874_2010_499_MOESM3_ESM.pdf/9432226)

(a)

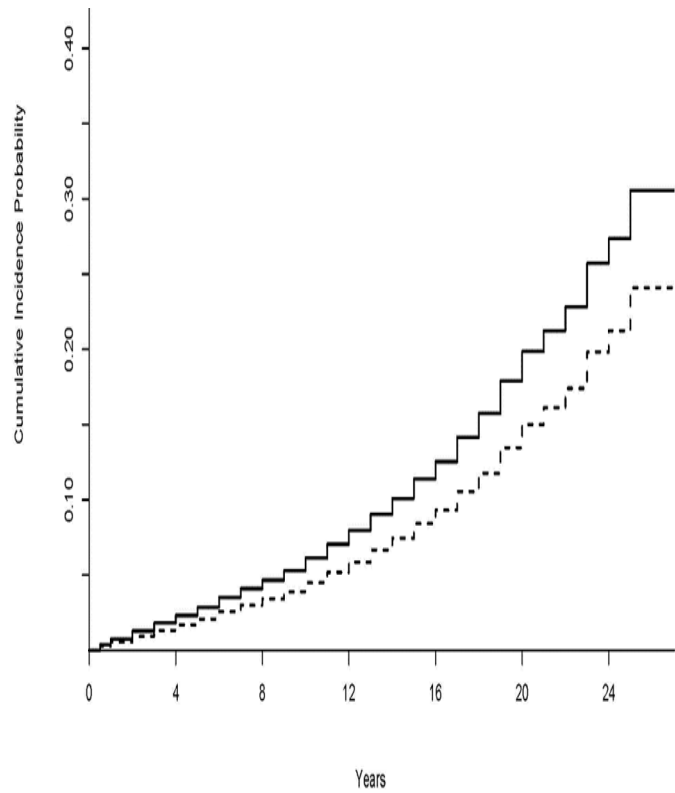

(b)

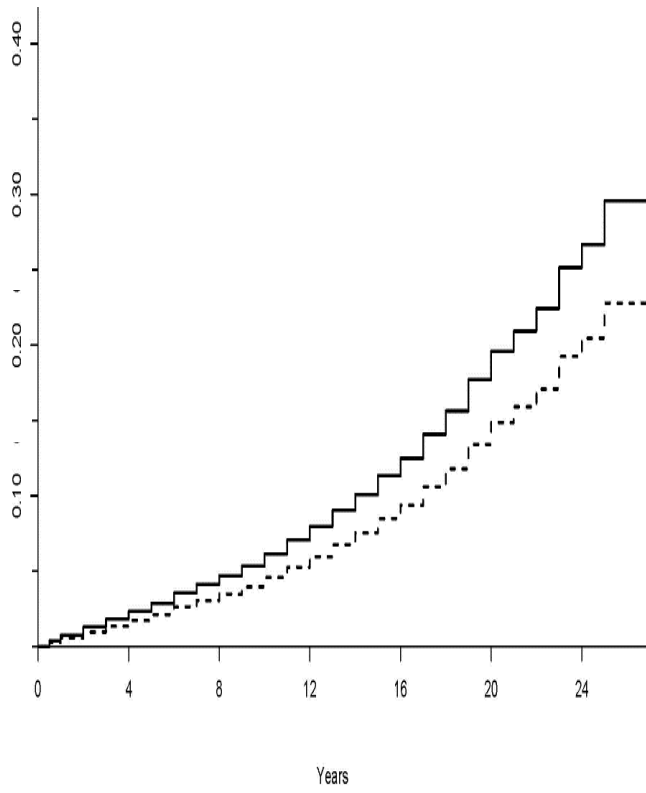

(c)

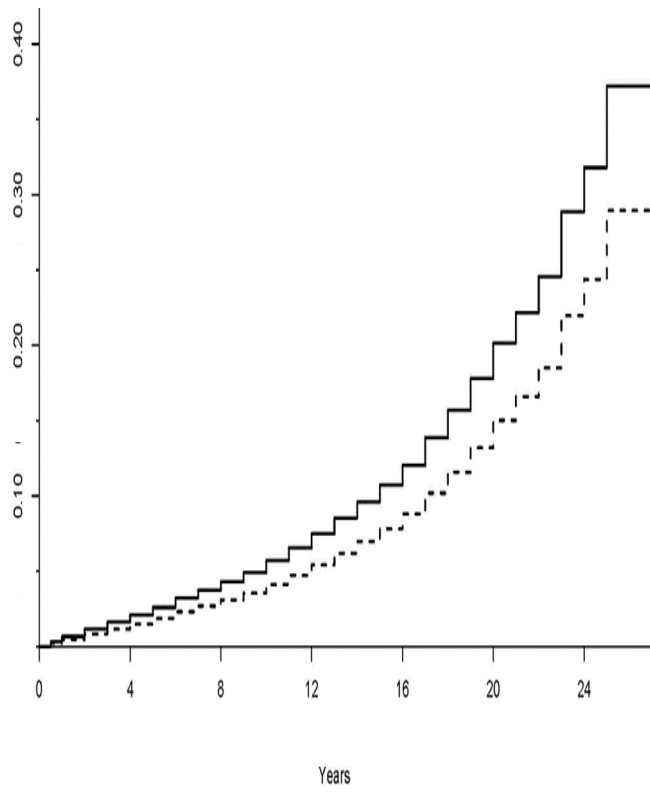

Supplement: MOESM3 [file 9432226]
